# Supplementary material for: Experimental Study of the Implantation Process for Array Electrodes into Highly Transparent Agarose Gel
Source: MDPI journal article supplement (doi:10.3390/ma17102334), 2024-05-14
Supplement: s1 [file s1]

## Supplementary Material

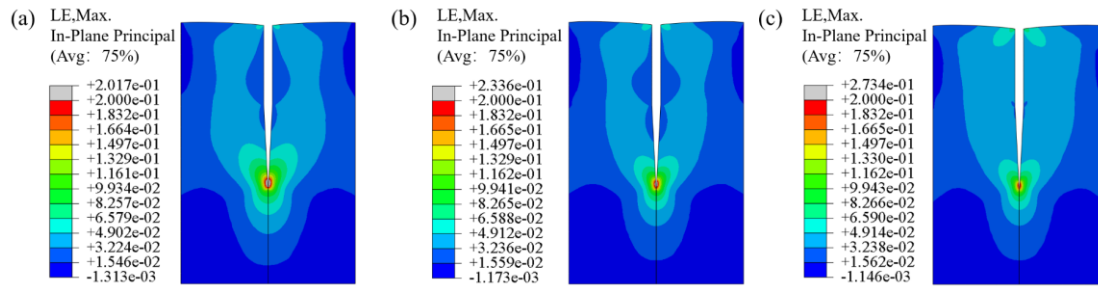

Figure. S1 Strain cloud diagrams at implantation speeds of (a)1 mm/s, (b)2.63 mm/s, (c)5 mm/s.

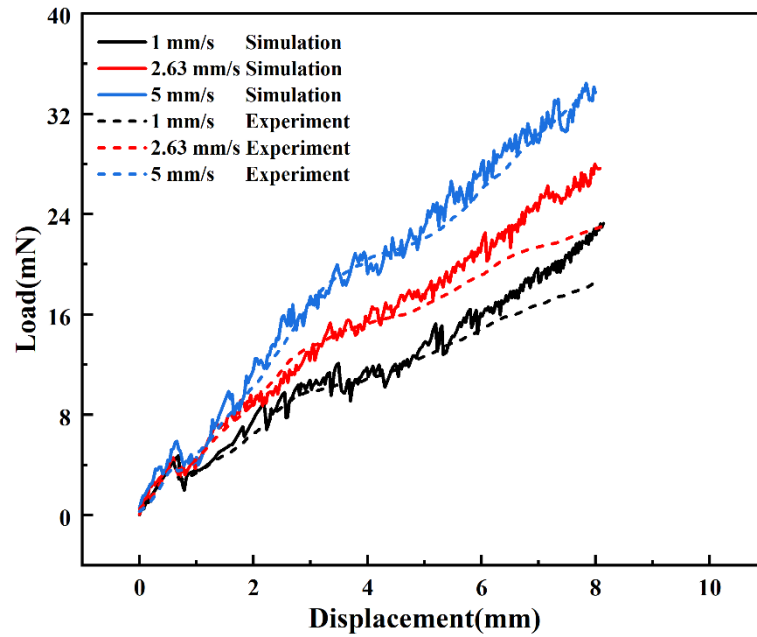

Figure. S2 Load-displacement curves of experiments and simulations under different implantation speeds.
